# Supplementary material for: Process Engineering of the Acetone-Ethanol-Butanol (ABE) Fermentation in a Linear and Feedback Loop Cascade of Continuous Stirred Tank Reactors: Experiments, Modeling and Optimization
Source: Preprints.org preprint supplement (doi:10.20944/preprints202101.0396.v1), 2021-01-20
Supplement: Supplementary file 1 [file SII_FUELS_Gtz.xlsx]

## Sheet: a - experimental
	§ experimentally observed variance (example for the calculation):												G18 = max(G6; G12; SD(E6;E12); 0.1)
																																		Volumemetric Productivity							Substrate Yield
				Biomass			Glucose			Acetone			Ethanol			Butanol			Acetic Acid			Butyric Acid			pH					Total Solvent				Butanol			Total Solvent				Butanol			Total Solvent
				[g L-1]			[g L-1]			[g L-1]			[g L-1]			[g L-1]			[g L-1]			[g L-1]			[-]					[g L-1]				[g L-1 h-1]			[g L-1 h-1]				[g g-1]			[g g-1]
	pH 5.6, F = 0.1 L h-1, Dtotal = 0.042 h-1
	F14	31-145 (4)	br1	2.03333	±	0.750754	39.5	±	7.79423	0.0789	±	0.060538	0.0676	±	0.0431367	0.4547	±	0.311504	10.9026	±	4.2092	9.398	±	3.57904	5.35	±	0.0762807
			br2	2.09867	±	0.462311	28.75	±	3.56195	0.7411	±	0.0378353	0.1843	±	0.0732611	2.8399	±	0.823302	10.4756	±	1.86527	8.1627	±	0.770004	5.4425	±	0.0807388
			br3	2.63867	±	0.528458	18	±	5.78792	1.2962	±	0.0944634	0.287	±	0.0942546	4.6993	±	1.16333	7.5796	±	1.41651	6.2415	±	0.742214	5.2825	±	0.0769334
			br4	2.41773	±	0.509356	8.875	±	6.04788	1.6632	±	0.15741	0.368	±	0.113897	6.0457	±	1.3543	4.8984	±	2.13775	4.2565	±	1.10008	5.2925	±	0.0812404
			br5	2.27933	±	0.30167	4.515	±	6.16228	1.9014	±	0.288988	0.4208	±	0.0864153	6.7664	±	0.934679	3.7796	±	1.81215	3.404	±	0.539003	5.2	±	0.0781025
			br6	2.186	±	0.29941	2.425	±	3.86159	1.8687	±	0.260746	0.4241	±	0.0685174	6.7634	±	0.616792	3.4659	±	1.56442	3.3785	±	0.409648	5.185	±	0.0791754
	F16	118-284 (6)	br1	2.01244	±	0.212951	40.8333	±	4.07022	0.135315	±	0.139425	0.135238	±	0.034204	0.950623	±	0.492641	9.70706	±	0.794834	8.18623	±	1.13388	5.54167	±	0.0312517
			br2	1.70667	±	0.847862	29.1667	±	4.95648	0.693021	±	0.158809	0.228283	±	0.0260748	2.94442	±	0.474927	7.99365	±	1.17795	6.89343	±	0.561746	5.225	±	0.0258844
			br3	2.13956	±	0.516044	20	±	2.82843	1.58087	±	0.181121	0.355135	±	0.0531722	5.27162	±	0.889062	5.98308	±	0.976921	5.33157	±	0.731065	5.295	±	0.0344964
			br4	2.46933	±	1.02564	10.8333	±	3.43026	2.10436	±	0.261932	0.455729	±	0.0771692	6.78928	±	1.0798	3.47402	±	1.12264	3.56126	±	1.10078	5.37167	±	0.100482
			br5	1.75378	±	0.45944	3.58833	±	3.59205	2.19777	±	0.222368	0.534186	±	0.0894463	7.59197	±	1.05739	1.93427	±	0.878967	2.42881	±	1.30076	5.375	±	0.105594
			br6	1.92444	±	0.876184	0.733333	±	1.65368	1.80755	±	0.905656	0.473873	±	0.254025	6.54226	±	3.34688	1.26476	±	0.713536	1.87846	±	1.20399	5.30667	±	0.146242						0.25
	MEAN		br1	2	±	0.8§	40.1667	±	7.8	0.107107	±	0.1	0.101419	±	0.1	0.702662	±	0.5	10.3048	±	4.2	8.79212	±	3.6	5.44583	±	0.1		br1	0.911188	±	0.7	1	0.175665	±	0.125	0.227797	±	0.175		0.0354283	±	0.0391432	0.0459423	±	0.0533622
			br2	1.9	±	0.8	28.9583	±	5	0.71706	±	0.2	0.206292	±	0.1	2.89216	±	0.8	9.23463	±	1.9	7.52806	±	0.8	5.33375	±	0.1		br2	3.81551	±	1.1	2	0.36152	±	0.1	0.476939	±	0.1375		0.0931703	±	0.0407791	0.122916	±	0.0552348
			br3	2.4	±	0.5	19	±	5.8	1.43854	±	0.2	0.321068	±	0.1	4.98546	±	1.2	6.78134	±	1.4	5.78653	±	0.7	5.28875	±	0.1		br3	6.74506	±	1.5	3	0.415455	±	0.1	0.562089	±	0.125		0.121597	±	0.0464698	0.164514	±	0.059858
			br4	2.4	±	1	9.85417	±	6	1.88378	±	0.3	0.411865	±	0.1	6.41749	±	1.4	4.18621	±	2.1	3.90888	±	1.1	5.33208	±	0.1		br4	8.71313	±	1.8	4	0.401093	±	0.0875	0.544571	±	0.1125		0.127976	±	0.0432311	0.173756	±	0.0566854
			br5	2	±	0.5	4.05167	±	6.2	2.04958	±	0.3	0.477493	±	0.1	7.17918	±	1.1	2.85694	±	1.8	2.91641	±	1.3	5.2875	±	0.1		br5	9.70626	±	1.5	5	0.358959	±	0.055	0.485313	±	0.075		0.128318	±	0.0338808	0.173486	±	0.0460356
			br6	2.1	±	0.9	1.57917	±	3.9	1.83813	±	0.9	0.448986	±	0.3	6.65283	±	3.3	2.36533	±	1.6	2.62848	±	1.2	5.24583	±	0.1		br6	8.93994	±	4.5	6	0.277201	±	0.1375	0.372498	±	0.1875		0.113878	±	0.0640888	0.153027	±	0.0872429
	pH 4.3, F = 0.1 L h-1, Dtotal = 0.042 h-1
	F14	220-295 (4)	br1	3.34133	±	0.158122	42	±	2.16025	0.896431	±	0.139706	0.214741	±	0.0321157	3.21508	±	0.39876	7.05843	±	1.78839	3.1056	±	0.955251	4.2775	±	0.0206155
			br2	3.40667	±	0.0993371	21.75	±	4.78714	1.867	±	0.232627	0.702746	±	0.0953071	6.92402	±	0.44655	4.8993	±	0.768996	1.29115	±	0.204537	4.3625	±	0.0386221
			br3	3.03467	±	0.208614	2.8565	±	2.34679	2.58679	±	0.109335	1.0065	±	0.171705	9.43069	±	0.331411	2.92341	±	0.758972	0.895835	±	0.14581	4.495	±	0.0544671
			br4	1.612	±	0.176357	0.00675	±	0.0135	2.45147	±	0.044002	1.10563	±	0.0914045	9.32617	±	0.293295	2.79655	±	0.726466	1.69757	±	0.150297	4.395	±	0.0369685
			br5	0.891333	±	0.119681	0	±	0	2.41992	±	0.102848	1.11484	±	0.12633	9.29612	±	0.2032	2.92704	±	0.84502	1.76993	±	0.39385	4.42	±	0.0668331
			br6	0.55	±	0.153997	0	±	0	2.40545	±	0.108636	1.11014	±	0.115322	9.2349	±	0.177959	2.98588	±	0.728189	1.75113	±	0.413287	4.4375	±	0.0780491
	F16	331-475 (5)	br1	2.90347	±	0.401917	34.6	±	6.15142	1.10794	±	0.54306	0.427678	±	0.329314	4.04051	±	1.50889	7.90239	±	1.311	3.06582	±	1.1703	4.364	±	0.0300666
			br2	2.56213	±	0.265225	14.4	±	5.1614	2.39143	±	0.327319	0.815536	±	0.270957	7.95616	±	1.11017	4.91118	±	0.96257	1.72301	±	0.457174	4.556	±	0.0581722
			br3	2.00533	±	0.200515	2.18	±	3.44058	3.29895	±	0.119907	1.04549	±	0.181671	9.91939	±	0.51555	2.12913	±	0.604695	1.02854	±	0.104062	4.638	±	0.105338
			br4	1.09547	±	0.442899	0.009	±	0.00784857	2.99099	±	0.412402	1.09366	±	0.153325	9.98188	±	0.277596	1.79846	±	0.235705	0.972772	±	0.171268	4.682	±	0.103034
			br5	0.614133	±	0.216991	0	±	0	2.8682	±	0.314061	1.08552	±	0.13919	9.91715	±	0.281523	1.78863	±	0.235996	0.979284	±	0.17638	4.68	±	0.0807465
			br6	0.393867	±	0.0829226	0.0004	±	0.0008	2.83301	±	0.268159	1.07288	±	0.126425	9.88544	±	0.280844	1.78701	±	0.204669	0.940888	±	0.10821	4.686	±	0.0646838						0.25
	MEAN		br1	3.1224	±	0.401917	38.3	±	6.15142	1.00219	±	0.54306	0.321209	±	0.329314	3.6278	±	1.50889	7.48041	±	1.78839	3.08571	±	1.1703	4.32075	±	0.1		br1	4.95119	±	2.38126	1	0.906949	±	0.377222	1.2378	±	0.595316		0.16718	±	0.116925	0.228166	±	0.174415
			br2	2.9844	±	0.422267	18.075	±	5.1614	2.12922	±	0.327319	0.759141	±	0.270957	7.44009	±	1.11017	4.90524	±	0.96257	1.50708	±	0.457174	4.45925	±	0.1		br2	10.3284	±	1.70845	2	0.930011	±	0.138772	1.29106	±	0.213556		0.177462	±	0.0483274	0.246355	±	0.071079
			br3	2.52	±	0.514667	2.51825	±	3.44058	2.94287	±	0.356078	1.02599	±	0.181671	9.67504	±	0.51555	2.52627	±	0.758972	0.962189	±	0.14581	4.5665	±	0.105338		br3	13.6439	±	1.0533	3	0.806253	±	0.0429625	1.13699	±	0.0877749		0.168315	±	0.0190435	0.237361	±	0.0325313
			br4	1.35373	±	0.442899	0.007875	±	0.1	2.72123	±	0.412402	1.09965	±	0.153325	9.65403	±	0.327855	2.2975	±	0.726466	1.33517	±	0.362397	4.5385	±	0.1435		br4	13.4749	±	0.893583	4	0.603377	±	0.020491	0.842182	±	0.0558489		0.160922	±	0.00573321	0.224611	±	0.0152694
			br5	0.752733	±	0.216991	0	±	0.1	2.64406	±	0.314061	1.10018	±	0.13919	9.60664	±	0.310516	2.35783	±	0.84502	1.37461	±	0.395323	4.55	±	0.13		br5	13.3509	±	0.763766	5	0.480332	±	0.0155258	0.667544	±	0.0381883		0.160111	±	0.00544211	0.222515	±	0.0131003
			br6	0.471933	±	0.153997	0.0002	±	0.1	2.61923	±	0.268159	1.09151	±	0.126425	9.56017	±	0.32527	2.38645	±	0.728189	1.34601	±	0.413287	4.56175	±	0.12425		br6	13.2709	±	0.719854	6	0.39834	±	0.0135529	0.552955	±	0.0299939		0.159337	±	0.00568675	0.221183	±	0.0123662
	pH 5.6, F = 0.22 L h-1, Dtotal = 0.092 h-1
	F18	30-100 (4)	br1	1.91467	±	0.468317	51.75	±	2.27761	0	±	0	0.0270184	±	0.0279734	0.163231	±	0.0611873	11.2239	±	1.39318	5.93467	±	1.04733	5.525	±	0.033541
			br2	1.922	±	0.308051	47.5	±	2.5	0.0572066	±	0.0283514	0.0785172	±	0.0203822	0.299264	±	0.0980307	12.8536	±	0.446026	8.71728	±	0.411139	5.3925	±	0.121937
			br3	2.25333	±	0.108681	43.5	±	3.57071	0.370949	±	0.0744834	0.11513	±	0.0237238	1.04238	±	0.274821	12.7733	±	0.335222	9.28869	±	0.360629	5.1325	±	0.0363146
			br4	2.28267	±	0.293794	38.25	±	5.30919	0.75801	±	0.180188	0.181006	±	0.0328859	2.19694	±	0.612855	12.2709	±	0.258652	8.85336	±	0.329841	5.1	±	0.03
			br5	3.48267	±	1.46323	33	±	3.4641	1.14573	±	0.159432	0.220939	±	0.0245623	3.21228	±	0.465821	11.0078	±	0.85499	7.96669	±	1.02411	5.1575	±	0.0363146
			br6	3.59533	±	1.61207	28.5	±	2.29129	1.47021	±	0.262568	0.264564	±	0.0514358	4.11719	±	0.669004	9.6512	±	0.691478	6.98448	±	0.741632	5.2175	±	0.0506828
	F21	76-148 (4)	br1	2.23733	±	0.190457	49	±	1.22474	0.0014634	±	0.00253469	0.046822	±	0.034816	0.0587361	±	0.0368703	2.85748	±	1.76507	1.48109	±	1.0278	5.5875	±	0.0928372
			br2	2.524	±	0.111323	44.5	±	1.11803	0.115487	±	0.0776205	0.0704931	±	0.0519753	0.353673	±	0.248323	3.30148	±	1.9426	2.10493	±	1.27421	4.9625	±	0.0861322
			br3	2.75333	±	0.158274	40.5	±	1.5	0.297482	±	0.198808	0.0760567	±	0.0470187	0.83202	±	0.587082	3.26333	±	1.88589	2.2748	±	1.31675	4.89	±	0.0935414
			br4	3.116	±	0.0984412	35.25	±	2.38485	0.77012	±	0.125069	0.129233	±	0.0248032	2.12488	±	0.413362	4.14138	±	0.137103	2.96089	±	0.0688365	4.9375	±	0.103531
			br5	3.3	±	0.261452	31.75	±	1.92029	1.07049	±	0.167879	0.179789	±	0.0212599	3.05945	±	0.429153	4.0948	±	0.337802	2.76033	±	0.254257	5.0175	±	0.0960143
			br6	3.51987	±	0.348891	26.75	±	2.27761	1.32354	±	0.185881	0.219614	±	0.016479	3.82867	±	0.443604	3.85001	±	0.266776	2.5383	±	0.216119	5.09	±	0.0784219
	F22	50-149 (5)	br1	1.97867	±	0.206387	49	±	2.44949	0	±	0	0.0332275	±	0.00937197	0.0410196	±	0.0320118	4.39708	±	1.04377	2.35645	±	0.630339	5.41	±	0.0948683
			br2	2.38267	±	0.0887143	44	±	0.707107	0.241923	±	0.038121	0.064843	±	0.00342057	0.640455	±	0.0945361	4.37013	±	0.877562	2.98568	±	0.646941	4.88	±	0.0874643
			br3	2.76267	±	0.115562	38.5	±	1.11803	0.677884	±	0.10921	0.10594	±	0.0122221	1.80681	±	0.293201	4.28164	±	1.2002	2.78948	±	0.664443	4.88	±	0.0734847
			br4	3.06133	±	0.241241	34.25	±	1.78536	1.22186	±	0.190544	0.168851	±	0.0208978	3.31442	±	0.532774	4.08327	±	1.41044	2.29678	±	0.618742	4.97	±	0.0640312
			br5	3.144	±	0.377887	30.25	±	2.16506	1.26213	±	0.874839	0.172019	±	0.115156	3.40838	±	2.30154	2.91667	±	2.26763	1.63265	±	1.03522	5.0425	±	0.0553963
			br6	3.268	±	0.305502	28	±	3.08221	1.928	±	0.409106	0.280141	±	0.0652923	5.29642	±	0.945997	3.58881	±	1.1016	1.86898	±	0.250981	5.1025	±	0.0511737
	F26	51-171 (4)	br1	1.34133	±	0.175298	51.5	±	2.08167	0.0637242	±	0.0391887	0.124464	±	0.0497201	0.630478	±	0.328564	4.1496	±	2.49021	2.55562	±	1.05062	5.515	±	0.0387298
			br2	1.85733	±	0.0453333	37.5	±	7.85281	0.85004	±	0.65708	0.29581	±	0.142454	3.17062	±	2.09549	3.05165	±	1.02247	1.93309	±	0.835503	4.675	±	0.131022
			br3	2.16133	±	0.184309	31.75	±	7.88987	1.06069	±	0.625063	0.321133	±	0.142094	3.72926	±	2.04597	2.90039	±	0.62778	1.95425	±	0.572549	4.65	±	0.0955685
			br4	2.54533	±	0.434121	27.5	±	8.42615	1.54701	±	0.661704	0.39351	±	0.151045	5.03999	±	2.18023	2.92858	±	0.917829	2.18219	±	0.652013	4.6425	±	0.143614
			br5	2.54933	±	0.442827	22.75	±	9.74252	1.74481	±	0.652199	0.407416	±	0.131232	5.54639	±	1.96733	2.26743	±	0.610987	1.90109	±	0.219466	4.845	±	0.11619
			br6	2.65333	±	0.343728	20.25	±	9.87843	1.87206	±	0.646387	0.415782	±	0.12804	5.8479	±	1.94508	2.04646	±	0.759918	1.83818	±	0.241704	4.8525	±	0.102103						0.55
	MEAN		br1	1.868	±	0.468317	50.3125	±	2.44949	0.0162969	±	0.1	0.057883	±	0.1	0.223366	±	0.328564	5.657	±	3.77213	3.08196	±	1.95825	5.50938	±	0.1		br1	0.297546	±	0.528564	1	0.122851	±	0.18071	0.16365	±	0.29071		0.0230571	±	0.0397463	0.0307144	±	0.0623276
			br2	2.1715	±	0.331561	43.375	±	7.85281	0.316164	±	0.65708	0.127416	±	0.142454	1.116	±	2.09549	5.89423	±	4.67472	3.93524	±	3.22119	4.9775	±	0.301917		br2	1.55958	±	2.89503	2	0.306901	±	0.57626	0.428885	±	0.796132		0.067128	±	0.157753	0.0938095	±	0.218448
			br3	2.48267	±	0.320161	38.5625	±	7.88987	0.601752	±	0.625063	0.154565	±	0.142094	1.85262	±	2.04597	5.80467	±	4.68242	4.07681	±	3.49158	4.88812	±	0.197055		br3	2.60893	±	2.81313	3	0.339647	±	0.375094	0.478305	±	0.51574		0.0864195	±	0.127245	0.1217	±	0.176015
			br4	2.75133	±	0.434121	33.8125	±	8.42615	1.07425	±	0.661704	0.21815	±	0.151045	3.16906	±	2.18023	5.85604	±	4.31291	4.0733	±	3.20514	4.9125	±	0.193208		br4	4.46146	±	2.99298	4	0.435745	±	0.299782	0.613451	±	0.411535		0.121014	±	0.122193	0.170366	±	0.169108
			br5	3.119	±	1.46323	29.4375	±	9.74252	1.30579	±	0.874839	0.245041	±	0.131232	3.80663	±	2.30154	5.07168	±	4.02906	3.56519	±	2.97349	5.01562	±	0.129057		br5	5.35746	±	3.30761	5	0.418729	±	0.25317	0.58932	±	0.363837		0.124552	±	0.11501	0.175295	±	0.164104
			br6	3.25913	±	1.61207	25.875	±	9.87843	1.64845	±	0.646387	0.295025	±	0.12804	4.77254	±	1.94508	4.78412	±	3.34089	3.30748	±	2.47252	5.06562	±	0.153234		br6	6.71602	±	2.7195	6	0.437483	±	0.178299	0.615635	±	0.249288		0.139855	±	0.0974834	0.196807	±	0.136663
	pH 4.3, F = 0.22 L h-1, Dtotal = 0.092 h-1
	F18	122-194 (4)	br1	1.27467	±	0.209914	49.5	±	1.80278	0.0994373	±	0.0267033	0.0405972	±	0.0305028	0.605415	±	0.173809	6.37879	±	1.13755	2.57594	±	0.425007	4.34	±	0.129035
			br2	2.34933	±	0.397409	42.75	±	3.49106	0.648531	±	0.055975	0.0795088	±	0.0116681	1.90946	±	0.23621	8.05466	±	0.957716	4.21401	±	0.527124	4.315	±	0.0923309
			br3	3.10133	±	0.431728	37.5	±	3.90512	1.72897	±	0.419787	0.270328	±	0.101924	4.54931	±	0.999719	7.17532	±	1.13766	2.62541	±	0.911179	4.3625	±	0.152868
			br4	3.73333	±	0.302288	30.75	±	3.89711	2.05465	±	0.311412	0.344857	±	0.0599369	5.23518	±	0.728461	6.38614	±	0.497276	1.59723	±	0.498139	4.5	±	0.150499
			br5	3.636	±	0.156694	25.75	±	3.03109	2.71139	±	0.187477	0.470563	±	0.0621311	6.89824	±	0.435375	5.57266	±	0.492193	1.14557	±	0.296272	4.6225	±	0.119452
			br6	3.716	±	0.165349	17.5	±	3.64005	2.90568	±	0.161071	0.558876	±	0.0903329	7.84539	±	0.519367	4.93	±	0.492664	1.05405	±	0.346005	4.715	±	0.118004
	F18	435-531 (5)	br1	1.19413	±	0.130905	51.4	±	2.05913	0.116819	±	0.0393474	0.0399715	±	0.0256493	0.727838	±	0.171749	8.78545	±	4.11331	3.0504	±	2.00756	4.276	±	0.0463033
			br2	2.13707	±	0.123044	41.4	±	3.82623	0.765001	±	0.260975	0.223507	±	0.118669	2.59393	±	0.807986	8.70582	±	1.14249	3.082	±	0.347812	4.338	±	0.0870402
			br3	2.8848	±	0.468707	28.8	±	3.70945	1.81956	±	0.376625	0.590936	±	0.211203	5.57556	±	0.984389	7.35521	±	0.789812	1.66277	±	0.513917	4.5	±	0.113666
			br4	2.48533	±	0.289227	17.2	±	3.31059	2.78354	±	0.484966	1.04395	±	0.312733	8.22294	±	1.17102	6.27452	±	0.340477	0.946292	±	0.216594	4.65	±	0.10139
			br5	2.75947	±	0.4343	9.4	±	1.49666	3.11173	±	0.375663	1.20136	±	0.264003	9.48269	±	0.77806	4.98779	±	0.495779	0.775549	±	0.130556	4.782	±	0.0970361
			br6	2.64747	±	0.468297	4.3	±	0.87178	3.57283	±	0.257809	1.35724	±	0.230983	10.8899	±	0.494469	3.39645	±	0.799608	0.778033	±	0.165515	4.8	±	0.121984
	F22	172-241 (4)	br1	0.933333	±	0.133	51.75	±	2.77263	0.0758854	±	0.091517	0.0241411	±	0.0246449	0.365596	±	0.181234	1.68256	±	0.794669	0.800868	±	0.395194	4.2325	±	0.0762807
			br2	1.71667	±	0.137228	49.75	±	1.78536	0.130461	±	0.0388062	0.0231815	±	0.0263651	0.523834	±	0.113321	2.07732	±	0.325506	1.21425	±	0.117845	4.0475	±	0.0807388
			br3	2.456	±	0.229566	44.5	±	2.29129	0.529921	±	0.0712643	0.0635742	±	0.0368021	1.49712	±	0.132162	2.04	±	0.289913	1.26022	±	0.349444	4.0225	±	0.0769334
			br4	2.99067	±	0.232241	40.25	±	2.16506	1.14346	±	0.0942113	0.143716	±	0.0103082	3.00759	±	0.213873	1.71862	±	0.338626	0.876462	±	0.155403	4.08	±	0.0812404
			br5	3.69467	±	0.174962	34.25	±	2.77263	1.72315	±	0.167313	0.211565	±	0.019906	4.55852	±	0.40149	1.49245	±	0.231458	0.527439	±	0.0843537	4.2	±	0.0781025
			br6	4.07467	±	0.148809	27.25	±	2.27761	2.15002	±	0.220018	0.300225	±	0.0314261	5.91783	±	0.52188	1.17306	±	0.408791	0.307163	±	0.122321	4.2975	±	0.0791754
	F22	506-554 (3)	br1	1.36356	±	0.102965	51.3333	±	1.24722	0.238394	±	0.030473	0.12565	±	0.00164513	1.22745	±	0.0598856	1.48297	±	0.161663	0.452121	±	0.142014	4.19667	±	0.0492161
			br2	2.656	±	0.0348372	45.6667	±	2.86744	0.564367	±	0.0507621	0.174611	±	0.00599679	2.25952	±	0.117314	1.56309	±	0.269389	0.619359	±	0.322932	3.93333	±	0.0449691
			br3	3.25867	±	0.0230426	35.6667	±	0.942809	1.33432	±	0.0672173	0.336107	±	0.0215579	4.24065	±	0.221979	1.28443	±	0.251305	0.335929	±	0.13196	3.96667	±	0.062361
			br4	3.52711	±	0.0948407	25	±	0.816497	1.93426	±	0.047225	0.641251	±	0.00990458	6.03292	±	0.137855	1.10042	±	0.18475	0.191689	±	0.0354182	4.06667	±	0.0573488
			br5	3.25156	±	0.0266073	14.3333	±	0.942809	2.38984	±	0.0155982	0.895718	±	0.0321231	7.35752	±	0.0490537	0.842078	±	0.140215	0.125668	±	0.0327159	4.16667	±	0.054365
			br6	3.18222	±	0.103448	7	±	0.816497	2.97776	±	0.05985	1.19632	±	0.0316598	9.09486	±	0.0669958	0.66007	±	0.10276	0.112006	±	0.0328824	4.13	±	0.0374166
	F26	435-532 (5)	br1	0.739733	±	0.333806	52.2	±	2.86356	0.170119	±	0.0994677	0.100955	±	0.0391742	0.899988	±	0.348646	3.56045	±	1.77057	1.68067	±	0.952559	4.284	±	0.104547
			br2	1.8016	±	0.86319	40.4	±	6.65582	1.0751	±	0.697362	0.336245	±	0.145292	3.43025	±	1.61732	2.57129	±	0.662078	1.23344	±	0.447393	4.138	±	0.147547
			br3	2.08427	±	0.679934	32	±	7.4162	1.40879	±	0.862858	0.405781	±	0.182313	4.34051	±	2.13291	1.85043	±	0.598847	0.864288	±	0.307243	4.176	±	0.162419
			br4	2.34507	±	0.486422	21	±	8.80341	1.97835	±	1.02768	0.546254	±	0.263686	5.94039	±	2.81533	1.16756	±	0.458106	0.591451	±	0.175627	4.244	±	0.170088
			br5	2.4192	±	0.27332	16	±	10.8167	2.55098	±	0.761245	0.684838	±	0.212656	7.66952	±	2.13047	0.91774	±	0.666074	0.419752	±	0.162988	4.322	±	0.141669
			br6	2.29333	±	0.218081	11.6	±	8.26438	2.80944	±	0.916585	0.743645	±	0.240791	8.17569	±	2.55853	0.594025	±	0.547914	0.265222	±	0.133126	4.348	±	0.12853
	F26	838-1034 (3)	br1	0.597333	±	0.184193	51.6667	±	4.04145	0.0788469	±	0.0396154	0.068283	±	0.0156374	0.599607	±	0.306184	2.52962	±	0.660332	0.908217	±	0.444926	4.23333	±	0.0152753
			br2	1.27556	±	0.283123	48	±	6.9282	0.282972	±	0.0582277	0.123861	±	0.0232519	1.33878	±	0.309268	2.6494	±	0.0747743	1.33414	±	0.325491	3.99667	±	0.118462
			br3	1.63556	±	0.208279	42	±	4	0.558277	±	0.0552436	0.180362	±	0.0204804	2.25057	±	0.331758	2.6636	±	0.227252	1.43802	±	0.404067	3.97667	±	0.136504
			br4	2.01778	±	0.155179	35	±	2.64575	1.02575	±	0.0858416	0.265844	±	0.0144511	3.62185	±	0.230979	2.38106	±	0.436567	1.0928	±	0.427782	3.99333	±	0.126623
			br5	2.65422	±	0.120984	26.6667	±	0.57735	1.59648	±	0.124195	0.398678	±	0.044699	5.23164	±	0.309456	1.90681	±	0.343324	0.653718	±	0.221364	4.08	±	0.0888819
			br6	2.84267	±	0.189446	15.6667	±	2.51661	2.29082	±	0.0878972	0.622269	±	0.0894855	7.20172	±	0.221498	1.58294	±	0.372132	0.382131	±	0.136498	4.20333	±	0.0665833						0.55
	MEAN		br1	1.01713	±	0.333806	51.3083	±	4.04145	0.129917	±	0.1	0.0665997	±	0.1	0.737649	±	0.348646	4.06997	±	4.11331	1.57804	±	2.00756	4.26042	±	0.129035		br1	0.934166	±	0.548646	1	0.405707	±	0.191755	0.513791	±	0.301755		0.0848686	±	0.0795748	0.107478	±	0.113098
			br2	1.98937	±	0.86319	44.6611	±	6.9282	0.577738	±	0.697362	0.160152	±	0.145292	2.00929	±	1.61732	4.27026	±	3.21395	1.94953	±	1.38649	4.12808	±	0.167805		br2	2.74718	±	2.45997	2	0.552556	±	0.808659	0.755476	±	0.676493		0.130993	±	0.164606	0.179099	±	0.24127
			br3	2.5701	±	0.679934	36.7444	±	7.4162	1.22997	±	0.862858	0.307848	±	0.211203	3.74229	±	2.13291	3.72816	±	2.77558	1.36444	±	0.911179	4.16739	±	0.222004		br3	5.28011	±	3.20697	3	0.686086	±	1.42194	0.96802	±	0.587945		0.16092	±	0.143034	0.227047	±	0.210307
			br4	2.84988	±	0.68397	28.2	±	8.80341	1.82	±	1.02768	0.497646	±	0.32366	5.34348	±	2.81533	3.17139	±	2.49012	0.882655	±	0.498139	4.25567	±	0.264852		br4	7.66112	±	4.16667	4	0.734728	±	2.1115	1.0534	±	0.572917		0.168034	±	0.13505	0.240916	±	0.197722
			br5	3.06919	±	0.535979	21.0667	±	10.8167	2.34726	±	0.761245	0.643787	±	0.361371	6.86635	±	2.13047	2.61992	±	2.10539	0.60795	±	0.344592	4.36219	±	0.279207		br5	9.8574	±	3.25309	5	0.755299	±	1.70438	1.08431	±	0.35784		0.176362	±	0.103719	0.253187	±	0.153897
			br6	3.12606	±	0.671392	13.8861	±	8.26438	2.78442	±	0.916585	0.796429	±	0.40254	8.18756	±	2.55853	2.05609	±	1.74046	0.483101	±	0.357574	4.41564	±	0.276603		br6	11.7684	±	3.87766	6	0.750526	±	2.13211	1.07877	±	0.355452		0.177551	±	0.087303	0.255203	±	0.129825
	pH 4.3, F = 0.22 L h-1, Dtotal = 0.092 h-1, with feedback from br4 to br2 (Fback = 0.051 L h-1)
	F22	295-460 (5)	br1	1.37493	±	0.172767	53	±	2.52982	0.292042	±	0.0356126	0.198197	±	0.0598451	1.55243	±	0.239832	1.22424	±	0.435075	0.317884	±	0.142763	4.29	±	0.0489898
			br2	2.5072	±	0.371303	41	±	2.89828	0.846243	±	0.117153	0.293082	±	0.0415879	3.11223	±	0.373635	1.09713	±	0.333577	0.386002	±	0.163834	4.072	±	0.0752064
			br3	3.15627	±	0.273125	35.2	±	5.11468	1.31527	±	0.258233	0.368123	±	0.0710348	4.27406	±	0.745473	0.958036	±	0.281922	0.227482	±	0.0759434	4.08	±	0.0576194
			br4	3.31093	±	0.149082	27.8	±	5.49181	1.90509	±	0.246623	0.52819	±	0.140042	5.85093	±	0.788876	0.840637	±	0.163468	0.104837	±	0.0610878	4.164	±	0.0531413
			br5	3.39413	±	0.299534	22	±	8.92188	2.2866	±	0.208763	0.653428	±	0.191472	6.93398	±	0.677041	0.679557	±	0.106858	0.101135	±	0.0215443	4.27	±	0.0579655
			br6	3.38667	±	0.357405	16.8	±	10.028	2.71842	±	0.223926	0.790121	±	0.257755	8.01326	±	0.728273	0.583058	±	0.0932092	0.0927204	±	0.0187133	4.26	±	0.069857
	F26	629-844 (6)	br1	0.871556	±	0.171178	58.5	±	5.85662	0.0756453	±	0.0280575	0.050336	±	0.0214435	0.528421	±	0.261663	3.11938	±	3.65042	0.886867	±	1.18259	4.22833	±	0.0285774
			br2	2.29467	±	0.394085	45	±	5.76194	0.799666	±	0.253212	0.269392	±	0.104616	2.9611	±	0.998035	1.95151	±	1.56436	0.656954	±	0.75649	4.05167	±	0.0934701
			br3	2.45822	±	0.26537	38.5	±	5.39444	1.25817	±	0.429145	0.344397	±	0.110142	4.1187	±	1.23114	1.72066	±	1.07313	0.608962	±	0.471312	4.07	±	0.10198
			br4	2.86489	±	0.342148	27.8333	±	6.3692	1.74805	±	0.355037	0.487509	±	0.201521	5.47338	±	1.4578	1.41674	±	0.730841	0.43839	±	0.220623	4.16333	±	0.0804156
			br5	2.91822	±	0.228971	19	±	5.51362	2.19111	±	0.287677	0.639819	±	0.174656	6.90726	±	1.32047	0.874247	±	0.508349	0.25205	±	0.105041	4.25167	±	0.079854
			br6	2.69111	±	0.220128	10.55	±	6.28132	2.74927	±	0.405139	0.825951	±	0.185091	8.62984	±	0.873078	0.511889	±	0.358102	0.155052	±	0.0643678	4.32	±	0.072111						0.55
	MEAN		br1	1.12324	±	0.251689	55.75	±	5.85662	0.183844	±	0.108199	0.124267	±	0.1	1.04043	±	0.512005	2.17181	±	3.65042	0.602376	±	1.18259	4.25917	±	0.1		br1	1.34854	±	0.720203	1	0.572234	±	0.281603	0.741695	±	0.396112		0.244806	±	0.457821	0.317303	±	0.606712
			br2	2.40093	±	0.394085	43	±	5.76194	0.822954	±	0.253212	0.281237	±	0.104616	3.03667	±	0.998035	1.52432	±	1.56436	0.521478	±	0.75649	4.06183	±	0.1		br2	4.14086	±	1.35586	2	0.835084	±	0.27446	1.13874	±	0.372862		0.178628	±	0.119252	0.24358	±	0.162315
			br3	2.80724	±	0.349022	36.85	±	5.39444	1.28672	±	0.429145	0.35626	±	0.110142	4.19638	±	1.23114	1.33935	±	1.07313	0.418222	±	0.471312	4.075	±	0.10198		br3	5.83936	±	1.77042	3	0.769337	±	0.225708	1.07055	±	0.324578		0.181269	±	0.0954204	0.25224	±	0.135254
			br4	3.08791	±	0.342148	27.8167	±	6.3692	1.82657	±	0.355037	0.507849	±	0.201521	5.66216	±	1.4578	1.12869	±	0.730841	0.271613	±	0.220623	4.16367	±	0.1		br4	7.99658	±	2.01436	4	0.778547	±	0.200448	1.09953	±	0.276974		0.175934	±	0.0801149	0.248469	±	0.111763
			br5	3.15618	±	0.299534	20.5	±	8.92188	2.23885	±	0.287677	0.646624	±	0.191472	6.92062	±	1.32047	0.776902	±	0.508349	0.176592	±	0.105041	4.26083	±	0.1		br5	9.8061	±	1.79962	5	0.761268	±	0.145252	1.07867	±	0.197958		0.175206	±	0.0730033	0.248256	±	0.101634
			br6	3.03889	±	0.357405	13.675	±	10.028	2.73384	±	0.405139	0.808036	±	0.257755	8.32155	±	0.873078	0.547474	±	0.358102	0.123886	±	0.1	4.29	±	0.1		br6	11.8634	±	1.53597	6	0.762809	±	0.0800322	1.08748	±	0.140797		0.179634	±	0.0577322	0.256091	±	0.0885925

## Sheet: b - simulated
				Biomass			Glucose			Acetone			Ethanol			Butanol			Acetic Acid			Butyric Acid			pH				Acidogenic	Intermediate	Solventogenic	Total		Acidogenic	Intermediate	Solventogenic	Total
				[g L-1]			[g L-1]			[g L-1]			[g L-1]			[g L-1]			[g L-1]			[g L-1]			[-]				[g L-1]	[g L-1]	[g L-1]	[g L-1]		[%]	[%]	[%]	[%]
	pH 5.6, F = 0.1 L h-1, Dtotal = 0.042 h-1																								pH-values were fed to the model as measured in the experiments				pH 5.6, F = 0.1 L h-1, Dtotal = 0.042 h-1
	simulated with model9 //parameter10e// input1 (161202_SteadyState_meanF14F16_D025_pH56_P1)		br1	2.7968			34.473			0.1357			0.0457			0.4597			5.7838			5.6688			5.44583				2.6707	0.0702	0.0559	2.7968		95.4913	2.51001	1.99871	100
			br2	2.8973			17.9282			0.8416			0.2562			2.5973			7.233			6.3402			5.33375				1.9206	0.6842	0.2925	2.8973		66.2893	23.6151	10.0956	100
			br3	2.8985			5.0165			1.6219			0.5115			5.1724			7.0087			5.2433			5.28875				1.4022	0.9003	0.596	2.8985		48.3767	31.0609	20.5624	100
			br4	2.3289			1.027			1.8748			0.6005			6.0658			6.8517			4.8037			5.33208				1.0123	0.6588	0.6578	2.3289		43.4669	28.288	28.2451	100
			br5	1.6584			0.2245			1.9256			0.6212			6.2709			6.815			4.7091			5.2875				0.612	0.4654	0.581	1.6584		36.903	28.0632	35.0338	100
			br6	1.1579			0.0576			1.9335			0.628			6.3373			6.8232			4.7059			5.24583				0.3335	0.3384	0.4861	1.1579		28.8021	29.2253	41.9812	100
	pH 4.3, F = 0.1 L h-1, Dtotal = 0.042 h-1																												pH 4.3, F = 0.1 L h-1, Dtotal = 0.042 h-1
	simulated with model9 //parameter10e// input3 (161205_SteadyState_meanF14F16_D025_pH43)		br1	2.7312			27.1737			1.1839			0.4131			4.1478			2.2931			1.3522			4.32075				1.7108	0.4997	0.5207	2.7312		62.6391	18.296	19.0649	100
			br2	2.7315			8.4418			2.2226			0.7884			7.9072			2.625			1.1759			4.45925				1.5951	0.4608	0.6756	2.7315		58.3965	16.8699	24.7337	100
			br3	2.3416			1.7544			2.6032			0.9293			9.317			2.6716			1.0595			4.5665				1.3367	0.3306	0.6744	2.3416		57.0849	14.1186	28.8008	100
			br4	1.4923			0.4303			2.6804			0.9582			9.606			2.6694			1.0256			4.5385				0.8235	0.1968	0.472	1.4923		55.1833	13.1877	31.629	100
			br5	0.9106			0.1405			2.6981			0.965			9.6737			2.6669			1.017			4.55				0.4953	0.1056	0.3097	0.9106		54.3927	11.5967	34.0105	100
			br6	0.5498			0.0607			2.7047			0.9678			9.7009			2.663			1.0148			4.56175				0.295	0.0565	0.1984	0.5498		53.6559	10.2765	36.0858	100
	pH 5.6, F = 0.22 L h-1, Dtotal = 0.092 h-1																												pH 5.6, F = 0.22 L h-1, Dtotal = 0.092 h-1
	simulated with model9 //parameter10e// input4 (161206_SteadyState_meanF18F21F22F26_D055_pH56_P1)		br1	2.0133			47.6016			0.0001			0			0.0002			2.6933			2.6967			5.50938				2.0132	0.0001	0.0001	2.0133		99.995	0.00496697	0.00496697	100
			br2	2.8427			37.9624			0.1792			0.0407			0.423			4.3902			4.174			4.9775				2.1684	0.5678	0.1065	2.8427		76.2796	19.974	3.74644	100
			br3	2.897			30.4068			0.5366			0.1339			1.3805			4.9106			4.3296			4.88812				1.7053	0.9385	0.2532	2.897		58.8643	32.3956	8.74008	100
			br4	2.8998			22.0971			1.0502			0.282			2.8878			4.7975			3.7024			4.9125				1.3261	1.1452	0.4286	2.8998		45.7307	39.4924	14.7803	100
			br5	2.9			13.3369			1.6207			0.4615			4.7034			4.4729			2.8563			5.01562				1.2003	1.1026	0.5971	2.9		41.3897	38.0207	20.5897	100
			br6	2.9			6.0064			2.0976			0.6214			6.3133			4.1787			2.1832			5.06562				1.1922	0.9634	0.7444	2.9		41.1103	33.2207	25.669	100
	pH 4.3, F = 0.22 L h-1, Dtotal = 0.092 h-1																								p = 0				pH 4.3, F = 0.22 L h-1, Dtotal = 0.092 h-1
	simulated with model9 //parameter10e// input2 (160809_SteadyState_meanF18F22F26_D055_pH43)		br1	1.5723			50.0334			0.082			0.0239			0.2431			1.7717			1.6491			4.26042				1.35637	0.155331	0.0605807	1.57228		86.2677	9.87932	3.85304	100
			br2	2.7816			38.0368			0.4387			0.1224			1.2497			3.0032			2.4386			4.12808				1.72225	0.800754	0.25863	2.78163		61.915	28.7872	9.29779	100
			br3	2.8932			28.7248			0.9764			0.2805			2.8566			3.0725			2.0747			4.16739				1.38262	1.07575	0.434845	2.89322		47.7884	37.1819	15.0298	100
			br4	2.8993			18.9703			1.6221			0.4829			4.9044			2.7364			1.3845			4.25567				1.14805	1.14127	0.609974	2.89929		39.5976	39.3637	21.0387	100
			br5	2.8993			9.7512			2.2342			0.6871			6.9611			2.3916			0.8827			4.36219				1.12597	1.0093	0.764049	2.89933		38.8357	34.8117	26.3527	100
			br6	2.8892			3.5858			2.6423			0.8288			8.3842			2.159			0.6323			4.41564				1.11762	0.876692	0.894851	2.88916		38.6831	30.3442	30.9727	100
	pH 4.3, F = 0.22 L h-1, Dtotal = 0.092 h-1, with feedback from br4 to br2 (Fback = 0.051 L h-1)																								p = 0.25				pH 4.3, F = 0.22 L h-1, Dtotal = 0.092 h-1			p = 0.25
	simulated with model9 //parameter10e// input2 (160809_SteadyState_meanF18F22F26_D055_pH43)		br1	1.57127			50.0453			0.0815377			0.0237105			0.241253			1.7714			1.6493			4.26042				1.3558	0.155214	0.0602577	1.57127		86.2868	9.87823	3.83496	100
			br2	2.7785			33.3955			0.763578			0.231363			2.3466			2.72806			1.97803			4.12808				1.60922	0.814747	0.354535	2.7785		57.9167	29.3233	12.76	100
			br3	2.8909			25.4807			1.2206			0.371441			3.7661			2.76772			1.69189			4.16739				1.37292	1.02459	0.493395	2.8909		47.491	35.4419	17.0672	100
			br4	2.8976			17.6062			1.72509			0.533097			5.3989			2.58654			1.25956			4.25567				1.23657	1.03971	0.621314	2.8976		42.6757	35.8819	21.4424	100
			br5	2.89768			8.71247			2.2994			0.727297			7.35298			2.34069			0.867508			4.36219				1.21751	0.918729	0.761444	2.89768		42.0167	31.7056	26.2777	100
			br6	2.87474			3.12017			2.66104			0.853899			8.62391			2.17473			0.669214			4.41564				1.20325	0.795539	0.875948	2.87474		41.856	27.6734	30.4705	100
	Variations of the feedback flux were just simulated but not investigated experimentally																								p = Fback /F
	pH 4.3, F = 0.22 L h-1, Dtotal = 0.092 h-1, with feedback from br4 to br2 (Fback = 0.022 L h-1)																								p = 0.1				pH 4.3, F = 0.22 L h-1, Dtotal = 0.092 h-1			p = 0.1
	simulated with model9 //parameter10e// input2 (160809_SteadyState_meanF18F22F26_D055_pH43)		br1	1.57193			50.0376			0.0818731			0.0238347			0.242496			1.77157			1.64914			4.26042				1.35617	0.155284	0.0604706	1.57193		86.2745	9.8786	3.84692	100
			br2	2.77988			35.9242			0.589541			0.172476			1.7541			2.86206			2.20419			4.12808				1.66407	0.811055	0.304749	2.77988		59.8614	29.1759	10.9627	100
			br3	2.89231			27.1965			1.09555			0.324308			3.2952			2.90709			1.86564			4.16739				1.37077	1.05714	0.464401	2.89231		47.3937	36.5499	16.0564	100
			br4	2.89877			18.277			1.67673			0.508549			5.15756			2.65001			1.30814			4.25567				1.19068	1.09129	0.616804	2.89877		41.0753	37.6466	21.2781	100
			br5	2.89882			9.21138			2.27044			0.708001			7.16537			2.35537			0.865933			4.36219				1.17116	0.963757	0.763896	2.89882		40.4014	33.2466	26.352	100
			br6	2.8831			3.3376			2.65482			0.84199			8.5108			2.15756			0.644655			4.41564				1.16034	0.83597	0.886789	2.8831		40.2463	28.9955	30.7582	100
	pH 4.3, F = 0.22 L h-1, Dtotal = 0.092 h-1, with feedback from br4 to br2 (Fback = 0.11 L h-1)																								p = 0.5				pH 4.3, F = 0.22 L h-1, Dtotal = 0.092 h-1			p = 0.5
	simulated with model9 //parameter10e// input2 (160809_SteadyState_meanF18F22F26_D055_pH43)		br1	1.5702			50.0579			0.0809654			0.023504			0.239184			1.77123			1.64974			4.26042				1.35526	0.155053	0.0598873	1.5702		86.3113	9.87474	3.81399	100
			br2	2.77781			30.3589			0.963154			0.300269			3.03899			2.61591			1.77243			4.12808				1.56166	0.808791	0.407365	2.77781		56.219	29.1161	14.665	100
			br3	2.88804			23.5692			1.34965			0.421413			4.26459			2.66543			1.56046			4.16739				1.39218	0.975146	0.520714	2.88804		48.2051	33.7649	18.03	100
			br4	2.89493			17.0072			1.7624			0.554988			5.61282			2.55402			1.24453			4.25567				1.28502	0.9878	0.622113	2.89493		44.3886	34.1217	21.4897	100
			br5	2.8951			8.2946			2.31691			0.743624			7.5102			2.35498			0.891626			4.36219				1.2636	0.876008	0.755495	2.8951		43.6461	30.2583	26.0956	100
			br6	2.86437			2.95045			2.65838			0.863698			8.71536			2.21746			0.709677			4.41564				1.24521	0.757439	0.861729	2.86437		43.4722	26.4434	30.0844	100
	pH 4.3, F = 0.22 L h-1, Dtotal = 0.092 h-1, with feedback from br4 to br2 (Fback = 0.22 L h-1)																								p = 1				pH 4.3, F = 0.22 L h-1, Dtotal = 0.092 h-1			p = 1
	simulated with model9 //parameter10e// input2 (160809_SteadyState_meanF18F22F26_D055_pH43)		br1	1.57143			50.0435			0.081618			0.02374			0.241548			1.77143			1.64925			4.26042				1.35589	0.155231	0.0603089	1.57143		86.2838	9.87833	3.83785	100
			br2	2.77494			26.6557			1.19617			0.382455			3.86363			2.53147			1.58645			4.12808				1.5205	0.790328	0.464114	2.77494		54.7939	28.4809	16.7252	100
			br3	2.87724			21.4138			1.48759			0.475988			4.80825			2.59005			1.45573			4.16739				1.42206	0.907793	0.547389	2.87724		49.4244	31.5508	19.0248	100
			br4	2.88547			16.4923			1.79017			0.574918			5.80606			2.54053			1.25256			4.25567				1.3401	0.925989	0.619384	2.88547		46.443	32.0914	21.4656	100
			br5	2.88583			7.95874			2.32471			0.75771			7.64399			2.38776			0.931555			4.36219				1.30983	0.829919	0.746087	2.88583		45.3882	28.7584	25.8534	100
			br6	2.84802			2.82692			2.64737			0.871521			8.78603			2.28042			0.762058			4.41564				1.28317	0.720438	0.844405	2.84802		45.055	25.2961	29.6489	100
